# Supplementary material
Source: PubMed Central journal article supplement (PMC6003425)
Supplement: NIHMS970361-supplement-1.pdf [file NIHMS970361-supplement-1.pdf]

**Table S1, related to Figure 3.** Individuals with CD33 mutations identified from human knockout investigations.

| <b>Cohort</b>    | <b>No.</b> | <b>Ref.</b>            | <b>Alt.</b> | <b>Location</b> | <b>Result</b>         |
|------------------|------------|------------------------|-------------|-----------------|-----------------------|
| Iceland          | 22*        | CCCGG                  | C           | Exon3           | Frameshift            |
| ExAC             | 21         | CCCGG                  | C           | Exon3           | Frameshift            |
|                  | 4          | T                      | C           | Exon 6/7        | Splice donor mutation |
|                  | 2          | ACCCAACAACACTGGTATCTTT | A           | Exon 4          | Frameshift            |
| PROMIS           | 1          | CCCGG                  | C           | Exon 3          | Frameshift            |
| Born in Bradford | 1          | TC                     | T           | Exon 6          | Frameshift            |
| <b>Total</b>     | <b>51</b>  |                        |             |                 |                       |

\* 4 deceased homozygotes on record (earliest death age 64, latest death age 93)  
 20 heterozygote couples with 51 offspring (1 death before age 15)
