# Supplementary material
Source: PubMed Central journal article supplement (PMC6003425)
Supplement: NIHMS970361-supplement-2.pdf [file NIHMS970361-supplement-2.pdf]

**Table S2, related to Figure STAR Methods.** Antibodies used for mass cytometry experiments. The “SPADE” column indicates the markers used for performing clustering in the SPADE analysis

| Antigen               | Conjugate | Clone     | Concentration | Manufacturer             | SPADE |
|-----------------------|-----------|-----------|---------------|--------------------------|-------|
| CD3                   | In-113    | UCHT1     | 4 µg/mL       | Biolegend                |       |
| CD45                  | In-115    | HI30      | 2 µg/mL       | Biolegend                | X     |
| CD41                  | La-139    | HIP8      | 1 µg/mL       | Biolegend                | X     |
| CD7                   | Nd-142    | M-T701    | 2 µg/mL       | BD Biosciences           | X     |
| CD71                  | Nd-143    | R17217    | 1 µg/mL       | Thermo Fisher Scientific | X     |
| CD235                 | Nd-144    | HIR2      | 1 µg/mL       | Biolegend                | X     |
| p-Akt (S473)          | Nd-145    | D9E       | 2 µg/mL       | CST                      |       |
| HLA-DR                | Nd-146    | L243      | 2 µg/mL       | Biolegend                | X     |
| CD56                  | Sm-147    | NCAM16.2  | 1 µg/mL       | BD Biosciences           | X     |
| CD34                  | Nd-148    | 581       | 2 µg/mL       | Biolegend                | X     |
| CD90                  | Sm-149    | 5E10      | 4 µg/mL       | Biolegend                | X     |
| CD117                 | Nd-150    | 104D2     | 2 µg/mL       | Biolegend                | X     |
| CD123                 | Eu-151    | 6H6       | 2 µg/mL       | Biolegend                |       |
| CD33                  | Sm-152    | P67.6     | 1 µg/mL       | BD Biosciences           |       |
| p-STAT1 (Y701)        | Eu-153    | 58D6      | 1 µL/test     | Fluidigm                 |       |
| p-MAPKAPK2 (T334)     | Sm-154    | 27B7      | 2 µg/mL       | CST                      |       |
| CD45RA                | Gd-155    | HI100     | 1.5 µg/mL     | Biolegend                | X     |
| p-p38 (T180/Y182)     | Gd-156    | D3F9      | 1 µL/test     | Fluidigm                 |       |
| p-STAT5 (Y694)        | Gd-157    | 47        | 2 µg/mL       | BD Biosciences           |       |
| p-STAT3 (Y705)        | Gd-158    | 4         | 1 µL/test     | Fluidigm                 |       |
| CD38                  | Tb-159    | HIT2      | 1 µg/mL       | Biolegend                | X     |
| CD14                  | Gd-160    | M5E2      | 2 µg/mL       | Biolegend                | X     |
| CD16                  | Dy-161    | 3G8       | 2 µg/mL       | Biolegend                | X     |
| CD11b                 | Dy-162    | ICRF44    | 2 µg/mL       | Biolegend                | X     |
| CD64                  | Dy-163    | 10.1      | 1 µg/mL       | Biolegend                | X     |
| CD15                  | Dy-164    | W6D3      | 3 µg/mL       | Biolegend                | X     |
| p-pRb (S807/811)      | Ho-165    | J112-906  | 0.75 µg/mL    | BD Biosciences           |       |
| p-ERK 1/2 (T202/Y204) | Er-167    | D13.14.4E | 1 µL/test     | Fluidigm                 |       |
| p-4E-BP1 (T37/T46)    | Er-170    | 236B4     | 1.5ug/mL      | CST                      |       |
| cleaved-PARP(D214)    | Yb-171    | F21-852   | 1 µg/mL       | BD Biosciences           |       |
| CD10                  | Yb-172    | HI10a     | 3 µg/mL       | Biolegend                | X     |
| CD19                  | Yb-173    | H1B19     | 2 µg/mL       | BD Biosciences           |       |
| CD20                  | Yb-174    | 2H7       | 2 µg/mL       | Biolegend                |       |

|                   |        |      |                |          |  |
|-------------------|--------|------|----------------|----------|--|
| p-STAT6<br>(Y641) | Yb-175 | 18   | 1 $\mu$ L/test | Fluidigm |  |
| p-CREB<br>(S133)  | Yb-176 | 87G3 | 1.5 $\mu$ g/mL | CST      |  |
