# Supplementary material
Source: PubMed Central journal article supplement (PMC6003425)
Supplement: NIHMS970361-supplement-3.pdf [file NIHMS970361-supplement-3.pdf]

**Table S3, related to Figure STAR Methods.** Read counts obtained for in silico off-target sites.

|                  | <b>A: ctrl</b> | <b>A: KO</b> | <b>B: ctrl</b> | <b>B: KO</b> | <b>C: ctrl</b> | <b>C: KO</b> | <b>D: ctrl</b> | <b>D: KO</b> | <b>E: ctrl</b> | <b>E: KO</b> |
|------------------|----------------|--------------|----------------|--------------|----------------|--------------|----------------|--------------|----------------|--------------|
| <b>CD33</b>      | 36046          | 48718        | 112698         | 45918        | 45249          | 91114        | 114119         | 93859        | 32849          | 57657        |
| <b>SIGLEC22P</b> | 150887         | 154131       | 189596         | 82198        | 110151         | 164654       | 172278         | 179984       | 136505         | 188909       |
| <b>SIGLEC6</b>   | 113085         | 102111       | 120395         | 89066        | 77231          | 100411       | 97718          | 103685       | 121784         | 119010       |
| <b>SIGLEC12</b>  | 171133         | 187857       | 228980         | 100470       | 106388         | 132404       | 216026         | 243815       | 165271         | 133763       |
| <b>SIGLEC17P</b> | 163266         | 131403       | 142744         | 119576       | 97174          | 121011       | 129145         | 121174       | 147368         | 118763       |
| <b>ARHGEF10L</b> | 62626          | 51350        | 78849          | 36779        | 31918          | 42924        | 41788          | 43362        | 63711          | 56986        |
| <b>GHDC</b>      | 99651          | 90767        | 24785          | 9495         | 42835          | 50821        | 92008          | 84776        | 90737          | 82150        |
| <b>VMO1</b>      | 130759         | 117516       | 118690         | 37829        | 83798          | 93694        | 85941          | 85368        | 97678          | 121912       |
| <b>DTNA</b>      | 119917         | 139556       | 181040         | 89921        | 113804         | 141691       | 130772         | 129215       | 184509         | 167817       |
| <b>PLPPR4</b>    | 102314         | 73700        | 126429         | 46387        | 80660          | 113143       | 138495         | 103885       | 107053         | 104453       |
| <b>TMEM177</b>   | 156096         | 127862       | 147087         | 75004        | 99567          | 121578       | 129651         | 129074       | 177013         | 138234       |
