# Supplementary material
Source: PubMed Central journal article supplement (PMC6003425)
Supplement: NIHMS970361-supplement-4.pdf [file NIHMS970361-supplement-4.pdf]

**Table S4, related to Figure STAR Methods.** Read counts obtained for CIRCLE-seq off-target sites.

|                      | <b>E: ctrl</b> | <b>E: KO</b> | <b>F: ctrl</b> | <b>F: KO</b> | <b>G: ctrl</b> | <b>G: KO</b> |
|----------------------|----------------|--------------|----------------|--------------|----------------|--------------|
| <b>CD33</b>          | 110300         | 66343        | 264312         | 180202       | 204554         | 140896       |
| <b>SIGLEC22P</b>     | 31640          | 42017        | 166952         | 144358       | 190766         | 95282        |
| <b>SIGLEC6</b>       | 314442         | 174156       | 236250         | 268136       | 334904         | 222232       |
| <b>LOC101928517</b>  | 191388         | 277868       | 219308         | 238288       | 199702         | 143718       |
| <b>ARHGEF10L</b>     | 126576         | 99838        | 124234         | 180766       | 166622         | 147738       |
| <b>TMEFF1</b>        | 23916          | 13908        | 100750         | 67410        | 56546          | 53488        |
| <b>RP5-1086K13.1</b> | 329252         | 30247        | 242136         | 32843        | 248454         | 56870        |
| <b>RP3-419C19.3</b>  | 91986          | 36756        | 117308         | 152088       | 107784         | 144626       |
| <b>TMEM206</b>       | 125034         | 157894       | 151880         | 85656        | 153342         | 166120       |
| <b>SIGLEC12</b>      | 25012          | 35632        | 117360         | 230292       | 180052         | 193224       |
| <b>ZSCAN16</b>       | 99404          | 251932       | 66618          | 138280       | 83078          | 116750       |
| <b>EPS8</b>          | 207060         | 38706        | 146646         | 232140       | 110812         | 77924        |
| <b>DAPK2</b>         | 82844          | 415966       | 250998         | 218092       | 240814         | 214460       |
| <b>c10orf20</b>      | 58208          | 52826        | 103410         | 38725        | 84102          | 47108        |
| <b>DGKG</b>          | 231462         | 41889        | 136854         | 60735        | 152360         | 69478        |
| <b>ALDH3B1</b>       | 112732         | 206830       | 152186         | 396572       | 192670         | 153756       |
| <b>RN7SL601P</b>     | 51908          | 63410        | 73688          | 93040        | 59408          | 81536        |
| <b>TSPAN2</b>        | 103822         | 45198        | 112800         | 27121        | 121662         | 11919        |
