# Supplementary material
Source: PubMed Central journal article supplement (PMC6003425)
Supplement: NIHMS970361-supplement-5.pdf [file NIHMS970361-supplement-5.pdf]

**Table S5, related to Figure STAR Methods.** Primer and probe sequences.

| <b>Primer/Probe</b> | <b>Title</b>                                | <b>Sequence</b>           |
|---------------------|---------------------------------------------|---------------------------|
| Primer              | Human CD33 Forward:                         | AGCTGCTTCCTCAGACATGC      |
| Primer              | Human CD33 Reverse:                         | CTGTATTTGGTACTTCCTCTCTCCA |
| Primer              | Rhesus macaque CD33 exon2 Forward:          | CCTAGCCCTTCTCCTCCACT      |
| Primer              | Rhesus macaque CD33 exon2 Reverse:          | GTTTGTGGCCACTGGAGAGT      |
| Primer              | Rhesus macaque CD33 exon3 Forward:          | GACGCTCCCTCTTGATTCTG      |
| Primer              | Rhesus macaque CD33 exon3 Reverse:          | ACAGAAACGCAGAAGGGACA      |
| Primer              | Rhesus macaque ddPCR CD33 deletion Forward: | CGGGAAGGAGCCATTGTATC      |
| Primer              | Rhesus macaque ddPCR CD33 deletion Reverse: | GGTCTCCTCCGTA CTCTT       |
| Probe               | Rhesus macaque ddPCR CD33 deletion:         | CTTGACTCTCCAGTGGCCACA     |
| Primer              | Rhesus macaque ddPCR CD33 distal Forward:   | GGACATTCGTGTCCTGGG        |
| Primer              | Rhesus macaque ddPCR CD33 distal Reverse:   | ACAGGGCTCATGTCCTTCTA      |
| Probe               | Rhesus macaque ddPCR CD33 distal:           | ACCTGGCTGAGTTCGGCAGT      |
